# Supplementary material
Source: PubMed Central journal article supplement (PMC124484)
Supplement: pnas_99_10_6806__3.pdf [file pnas_99_10_6806__3.pdf]

CCATTTTGTGCACCTTGATCAAAGCCCATGTCTACTAGGCCCCAGCACCTCTGCACCCCA 60  
TAAAGATTGCACGCTCTTTTTCCATCAGGGGTCGTACCA**TGG**CTGCCGCTGAGGTCCCT 120  
1 M A A A E V P  
GTCCCTTCTGGGTACTTCAACCAGATCAAAGAGCAGAAGTTGAAGCCTGGAGACCTAGAG 180  
8 V P S G Y F T Q I K E Q K L K P G D L E  
GAGGAGAAAGAGGAGGACCGGGTACAAGAGTGAAGCCAGGAGGAGTTGTCAAGGAG 240  
28 E E K E E D G V Q R V E A Q E G V V K E  
GTGGAGGCCGAGAACAGTTGCCTGCTTCTGGAGGCCAGGGCCCCGGTGGAGAGCGACAGG 300  
48 V E A E N S C L L L E A R A P V E S D R  
CGGATCCCTGACCTGCAAACGGTGCACCTGGAGTCCCAGGATGTGCACCTACAGGGGCTG 360  
68 R I L T L Q T V H L E S Q D V H L Q G L  
GGATGGCTGAGCGTCCACACTCTGAGGAGCTTTCAGGGACGGTACCAAGGCGGAAGGC 420  
88 G W L S V P H S E E L S G T V P E A E G  
ATACTGCAGTGGCCATCCGTGCTGTGGCTCGACCCAGAGCCCAGCTCAGCCTTCAGCAT 480  
108 I L Q L P S V L W L D P E P Q L S L Q H  
TGCGTGACCGTCAAGCATCCCGAAGAGCTGTACCCACAGGAGGCTGCAGCGGATACAT 540  
128 C V T V S I P E E L Y P P E E L Q R I H  
TTTCACCTGCTGAGAGAGAATGTGCTAATGGCCGAGGAGAACCAGAGTTAACACCCAGAC 600  
148 F H L L R E N V L M A E E N P E L T P D  
TTGGACGAAAGCACAGCCCTGAAAAGCCCGAAGAAGATGAAAAGGACCAGCTCCCGCCC 660  
168 L D E S T A L K K P E E D E K D Q L P P  
CAGGAGAGACAGACAAGAGAGAAGAGAGTTGCTCCCTTCTGGAAATGAAACCAAAGAG 720  
188 Q G E T D K R E E R L L L L E M K P K E  
GAAAGAGACGACGAAATGCTCCTGACCAATTCCCATCTAAGCCTCGAAGAACAGCAAGAT 780  
208 G K D D E I V L T I S H L S L E E Q Q D  
CCACCAGCGCCCAATCAGACAAGTGTGCCGGGAGCCAAGCCGCAAAAACCAAACGGCGG 840  
228 P P A A N Q T S V P G A K A A K P K R R  
AGGACAGCAAGGAAAGCCTCAGAGCTTTCAGTGTGACACCTGCCCGTTCACCTTCCTCC 900  
248 R Q T K G K P Q S F Q C D T C P F T S S  
=====ZF1=====  
AAGCTCTCACTTTCAATCGTCACATCAAATTCAAGCAATGAGAGGCCACACCTGTGT 960  
268 K L S T F N R H I K I H S N E R P H L C  
=====ZF2=====  
CACCTGTGCTGAAGGCCTCCGGAGTGTCACTCTTCTAGGAACCATGTGAACACCCAC 1020  
288 H L C L K A F R T V T L L R N H V N T H  
=====ZF3=====  
ACAGGAACAGGCCCAAGTGCAGGGACTGCGACATGGCGTTTGTCCAGCGGAGAA 1080  
308 T G T R P H K C R D C D M A F V T S G E  
=====ZF4=====  
CTCGTCCGGACAGGCGTTACAAAACACTTATGAGAAGCCCTTCAAGTGTCCCTGTGC 1140  
328 L V R H R R Y K H T Y E K P F K C S L C  
=====ZF5=====  
AAGTACGCAGCGTGCAGGCAAGATGAAGCGTCAATCCGCTCACACCGGGTGG 1200  
348 K Y A S V E A S K M K R H I R S H T G E  
=====ZF6=====  
CGTCCCTCCAGTGTGCGAGTGTCTATGCGCAGGAGACTCCTACAAGCTGAAGCGC 1260  
368 R P F Q C C Q C A Y A S R D S Y K L K R  
=====ZF7=====  
CACATGAGGACACACTCAGGTGAGAAGCCGTATGAATGTCCACCTGTCCAGTCCGGTTC 1320  
388 H M R T H S G E K P Y E C P T C H V R F  
=====ZF8=====  
ACCCAGAGCGGACCATGAAAATCCATATAGCACAGAAGCACGAGAGAATGTGCCAAA 1380  
408 T Q S G T M K I H I A Q K H G E N V P K  
=====ZF9=====  
TAGGATGTCCCACTGTGCCACATCATCGGAGGAGAGCGACCTGCGTGTCCATCTG 1440  
428 Y E C P H C A T I I A R K S D L R V H L  
=====ZF10=====  
CGTAACCTGCACAGCAGGCCCGGAGGAGATGAAGTCCGATACTGTCCCGTGGCTTC 1500  
448 R N L H S Q S P E E M K C R Y C P A G F  
=====ZF11=====  
CATGAGCGCTATGCCTCATTGACACCCAGAGGCCACAAGAACGAGAAGATTCAAG 1560  
468 H E R Y A L I Q H Q R T H K N E K K F K  
=====ZF12=====  
TGCAAGCAGTGGGATTACCGGTGCAAGCAGGAGCGATGCTTGAAGGCGCATGCGCATG 1620  
488 C K Q C D Y A C K Q E R C L K A H M R M  
=====ZF13=====  
CACACAGGAGAAAGCCCTTCTCCTGGCTGCAACAAGCACTCCGACAGAAGCAG 1680  
508 H T G E K P F S C L A C N K H F R Q K Q  
=====ZF14=====  
CTACTGACCGTGCACCTGAGGAAGTACCATGACCCGAACCTCGTCCCAATCTGCACCTG 1740  
528 L L T V H L R K Y H D P N F V P N L H L  
=====ZF15=====  
TGCTCAAGTGTGATAAACGTTTCTCCCGTGGAGTAACTGCAGAGACACAGAAGAAG 1800  
548 C L K C D K R F S R W S N L Q R H R K K  
=====ZF16=====  
TGTGACCCGAGCATGAGACGTTAGCCCCCAACAGGACAGGAGACCAAGTACAAAGACA 1860  
568 C D P E H E T L A P N K D R R P V T R T  
=====ZF17=====  
CAGGCTCGGAGGAGAAAGCAGGACACAAGAAGGGGAGCCTCAGTGCCTGGGGAGCAG 1920  
588 Q A S E G E A G H K E G E P Q C P G E Q  
GCTCTGGGCCACCAAGGAGAAGCAGCGGGAGCCAGAGCCAGACCAAGGCTTACCTGC 1980  
608 A L G H Q G E A A G S Q S P D H G L T C  
GAGATGATCTTTAAATGATGATAAGTGAATGGATAAGTGAAGTGCAGTGCCTCTCCGTG 2040  
628 E M I F N M M D K \*  
CAGTGGCTCTGGGGGAGAAGAACAGTTAGAAATAAGTTCACAGACACAGCACAGTGTTC 2100  
TCAGAGTTTGAATAGTGTGATAAATGTTGAGAGAAGGGGAAAAAACCTGCAGTA 2160  
TTTCCAAAGACTTGAAGTGCAGCTCGAAGTGAAGTGCACATATCTGGGCCCTAGCAGGT 2220  
GCCAGAAATGATCAGGACAGATTTAGGTGATACTTATGTCCACGGGGCTCAGACCA 2280  
GTTAACGCTTGGTGTGAGCAGAAAATTTTGAAGTGTGTACCCACCTCAA..... 2340  
(the rest of the 3'-UTR is not included into this Figure)
