# Supplementary material
Source: PubMed Central journal article supplement (PMC124484)
Supplement: pnas_99_10_6806__7.pdf [file pnas_99_10_6806__7.pdf]

| protein domains                     | 5'-splice donor consensus<br>(A/C)AG//gt(a/g)agt | Intron size<br>(kb) | 3'-splice acceptor consensus<br>YYYYYYYYYncag//G |
|-------------------------------------|--------------------------------------------------|---------------------|--------------------------------------------------|
|                                     |                                                  |                     |                                                  |
| CTCF: ZF1+ZF2                       | .CAC.ACA.G//gtgctg<br>H T G                      | 4.000               | ctttctctag//GT.ACT.CGC.CCT.<br>T R P             |
| BORIS: ZF1+ZF2                      | .CAC.ACA.G//gtaaaa<br>H T G                      | 0.316               | gattttacag//GA.ACC.AGG.CCC.<br>T R P             |
| CTCF: ZF3 + 1/2 ZF4                 | .AGT.GTA.GAA.//gtgagt<br>S V E                   | 4.0                 | cgtatttcag//.GTC.AGC.AAA.TTA.<br>V S K L         |
| BORIS: ZF3 + 1/2 ZF4                | .AGT.GTG.GAG.//gtaaa<br>S V E                    | 2.9                 | tatttattag//.GCA.AGC.AAA.TTG.<br>A S K L         |
| CTCF: 1/2 ZF4 + ZF5                 | .CAT.TCA.G//gtagga<br>H S G                      | 0.7                 | ttttctttaag//GG.GAA.AAG.CCT.<br>E K P            |
| BORIS: 1/2 ZF4 + ZF5                | .CAC.TCA.G//gtaagg<br>H S G                      | 0.97                | tctgcatctcag//GT.GAG.AAG.CCT.<br>E K P           |
| CTCF: ZF6 + 1/2 ZF7                 | .GAT.TTG.G//gtaagt<br>D L G                      | 5.0                 | tgctttcag//GT.GTC.CAC.TTG.<br>V H L              |
| BORIS: ZF6 + 1/2 ZF7                | .GAC.CTA.C//gtgagt<br>D L R                      | 1.839               | ccatttttag//GT.GTG.CAT.ATG.<br>V H M             |
| CTCF: 1/2 ZF7 + ZF8<br>+ 1/2 ZF9    | .TGT.AGA.CAG.//gtagga<br>C R Q                   | 1.8                 | ccgtttcag//.GAG.AGG.CAC.<br>E R H                |
| BORIS: 1/2 ZF7 + ZF8<br>+ 1/2 ZF9   | .TGC.AAG.CAG.//gtattg<br>C K Q                   | 3.814               | ccctcttag//.GAA.CGT.CAT.<br>E R H                |
| CTCF: 1/2 ZF9 + ZF10<br>+ 1/2 ZF11  | .ACA.CGT.CGG.//gtaagg<br>T R R                   | 1.0                 | ctttttgtag//.AAT.ACC.ATG.GCA.<br>I N M A         |
| BORIS: 1/2 ZF9 + ZF10<br>+ 1/2 ZF11 | .TCC.CGC.TGG.//gtaagc<br>S R W                   | 5.004               | ttctccgacag//.ATT.AAC.CTG.CAC.<br>I N L H        |
